# Supplementary material for: Involvement of PKCε in FSH-induced connexin43 phosphorylation and oocyte maturation in mouse
Source: PubMed Central journal article supplement (PMC6124567; doi:10.1242/bio.034678), 2018-07-30
Supplement: biolopen-7-034678-s1.pdf [file biolopen-7-034678-s1.pdf]

**Table S1****The primers used for real-time PCR**

| Genes          | Forwards (5' to 3')   | Reverses (5' to 3')   |
|----------------|-----------------------|-----------------------|
| PKC $\epsilon$ | ACTGCACCATCCAGTTCGAG  | CTTCACCCGATGATCCCGAG  |
| EGFR           | CTTCACCCGATGATCCCGAG  | GGTGTGAGAGGTTCCACGAG  |
| AREG           | GGTCTTAGGCTCAGGCCATTA | CGCTTATGGTGGAAACCTCTC |
| EREG           | GCATCCCAGGAGAATCCGAG  | ACATCGCAGACCAGTGTAGC  |
| BTC            | AAACCCACTTCTCTCGGTGC  | AAACAGGTCCACTCGCTCAC  |
| HAS2           | TGGTGAGACAGAAGAGTCCCA | TGGTGAGACAGAAGAGTCCCA |
| PTX3           | CTGTGCTGGAGGAACTGCG   | CAGGATGCACGCTTCCAAA   |
| Tnfaip6        | AATCCGGCTCAACAGGAGTG  | AGCAGACCTGGTTGTCATCG  |
| $\beta$ -actin | CTTTGCAGCTCCTTCGTTGC  | CCTTCTGACCCATTCCCACC  |
